# Supplementary material for: Fiber-optic infrared reflectance spectroelectrochemical studies of osmium and ruthenium nitrosyl porphyrins containing alkoxide and thiolate ligands
Source: Royal Society of Chemistry journal article supplement (doi:10.1039/b510717b), 2005-11-23
Supplement: b510717b.pdf [file b510717b.pdf]

SUPPORTING INFORMATION**Fiber-optic Infrared Reflectance Spectroelectrochemical Studies of Osmium and Ruthenium Nitrosyl Porphyrins Containing Alkoxide and Thiolate Ligands**

Shawn M. Carter,<sup>a</sup> Jonghyuk Lee,<sup>a</sup> Christopher Adam Hixson,<sup>a</sup> Douglas R. Powell,<sup>b</sup>  
Ralph A. Wheeler,<sup>\*a</sup> Michael J. Shaw,<sup>\*c</sup> and George B. Richter-Addo<sup>\*a</sup>

<sup>a</sup> Department of Chemistry and Biochemistry, University of Oklahoma, 620 Parrington Oval, Norman, OK 73019. <sup>b</sup> Crystallography Laboratory, Department of Chemistry, University of Kansas, Lawrence, KS 66045. <sup>c</sup> Department of Chemistry, Box 1652, Southern Illinois University Edwardsville, Edwardsville, IL 62026.

\*\*\*\*\*

1. Difference FTIR spectrum (Figure S1) showing formation of product from the first oxidation of (OEP)Ru(NO)(OEt) in CH<sub>2</sub>Cl<sub>2</sub> containing 0.1 M NBu<sub>4</sub>PF<sub>6</sub>, with the potential held at +0.58 V vs. the Cp<sub>2</sub>Fe<sup>0/+</sup> couple.
2. Low temperature (-78 °C) cyclic voltammogram of (OEP)Ru(NO)(SEt) in CH<sub>2</sub>Cl<sub>2</sub> (Figure S2) containing 0.1 M NBu<sub>4</sub>PF<sub>6</sub>. Potentials are referenced to the Cp<sub>2</sub>Fe<sup>0/+</sup> couple at  $E^{\circ'} = 0.00$  V). Scan rate of 200 mV/s.
3. Crystal structural information for (OEP)Os(NO)(OEt) and (OEP)Os(NO)(SEt).

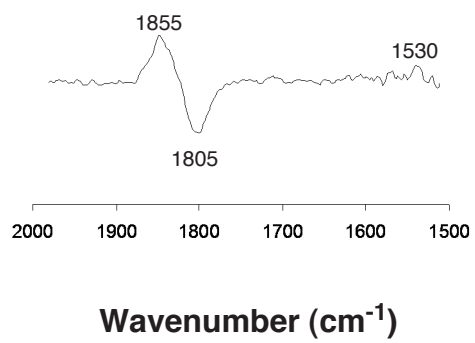**Figure S1**

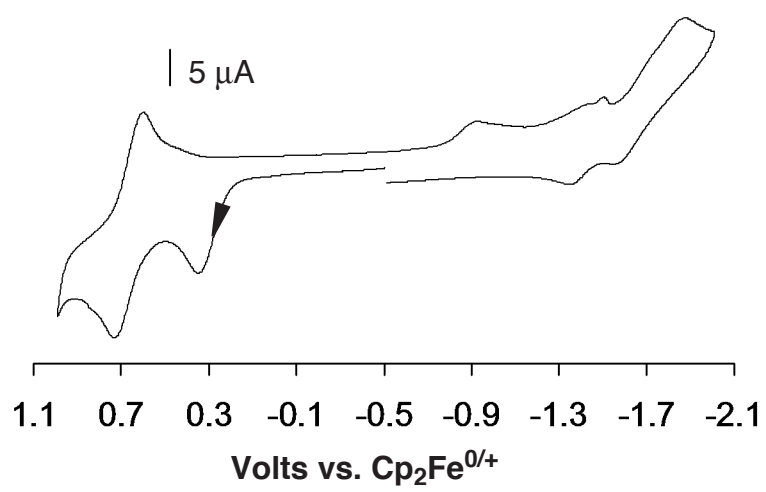**Figure S2**

Table 1. Crystal data and structure refinement for (OEP)Os(NO)(OEt).

|                                   |                                                                              |                 |
|-----------------------------------|------------------------------------------------------------------------------|-----------------|
| Identification code               | CCDC 286639                                                                  |                 |
| Empirical formula                 | C <sub>38</sub> H <sub>49</sub> N <sub>5</sub> O <sub>2</sub> O <sub>s</sub> |                 |
| Formula weight                    | 798.02                                                                       |                 |
| Temperature                       | 153(2) K                                                                     |                 |
| Wavelength                        | 0.71073 Å                                                                    |                 |
| Crystal system                    | Triclinic                                                                    |                 |
| Space group                       | P-1                                                                          |                 |
| Unit cell dimensions              | a = 8.6866(14) Å                                                             | ∠ = 86.080(2)°. |
|                                   | b = 10.0634(16) Å                                                            | ∠ = 77.988(2)°. |
|                                   | c = 11.0019(17) Å                                                            | ∠ = 65.350(2)°. |
| Volume                            | 854.8(2) Å <sup>3</sup>                                                      |                 |
| Z                                 | 1                                                                            |                 |
| Density (calculated)              | 1.550 Mg/m <sup>3</sup>                                                      |                 |
| Absorption coefficient            | 3.771 mm <sup>-1</sup>                                                       |                 |
| F(000)                            | 404                                                                          |                 |
| Crystal size                      | 0.36 x 0.26 x 0.20 mm <sup>3</sup>                                           |                 |
| Theta range for data collection   | 2.63 to 26.50°.                                                              |                 |
| Index ranges                      | -10 ≤ h ≤ 10, -12 ≤ k ≤ 12, -13 ≤ l ≤ 13                                     |                 |
| Reflections collected             | 8949                                                                         |                 |
| Independent reflections           | 3514 [R(int) = 0.0301]                                                       |                 |
| Completeness to theta = 26.50°    | 99.1 %                                                                       |                 |
| Absorption correction             | Semi-empirical from equivalents                                              |                 |
| Max. and min. transmission        | 0.5193 and 0.3438                                                            |                 |
| Refinement method                 | Full-matrix least-squares on F <sup>2</sup>                                  |                 |
| Data / restraints / parameters    | 3514 / 49 / 251                                                              |                 |
| Goodness-of-fit on F <sup>2</sup> | 1.106                                                                        |                 |
| Final R indices [I > 2σ(I)]       | R1 = 0.0398, wR2 = 0.0966                                                    |                 |
| R indices (all data)              | R1 = 0.0522, wR2 = 0.1039                                                    |                 |
| Largest diff. peak and hole       | 2.350 and -1.880 e.Å <sup>-3</sup>                                           |                 |

Table 2. Atomic coordinates ( $\times 10^4$ ) and equivalent isotropic displacement parameters ( $\text{\AA}^2 \times 10^3$ ) for (OEP)Os(NO)(OEt).  $U(\text{eq})$  is defined as one third of the trace of the orthogonalized  $U^{ij}$  tensor.

|        | x        | y        | z        | $U(\text{eq})$ |
|--------|----------|----------|----------|----------------|
| Os(1)  | 5000     | 5000     | 5000     | 54(1)          |
| N(1)   | 3954(5)  | 3552(4)  | 5732(3)  | 48(1)          |
| N(2)   | 3674(5)  | 5416(4)  | 3563(3)  | 50(1)          |
| N(3)   | 2959(12) | 6407(9)  | 5925(9)  | 44(2)          |
| O(1)   | 1800(9)  | 7369(8)  | 6500(6)  | 58(2)          |
| C(1)   | 4214(6)  | 2788(5)  | 6806(4)  | 51(1)          |
| C(2)   | 3201(6)  | 1922(5)  | 6998(4)  | 54(1)          |
| C(3)   | 2359(6)  | 2180(5)  | 6043(4)  | 53(1)          |
| C(4)   | 2819(6)  | 3229(5)  | 5253(4)  | 49(1)          |
| C(5)   | 2184(6)  | 3828(5)  | 4189(4)  | 49(1)          |
| C(6)   | 2565(6)  | 4833(5)  | 3410(4)  | 46(1)          |
| C(7)   | 1862(6)  | 5447(5)  | 2307(4)  | 54(1)          |
| C(8)   | 2573(7)  | 6384(5)  | 1825(4)  | 58(1)          |
| C(9)   | 3718(6)  | 6366(5)  | 2605(4)  | 51(1)          |
| C(10)  | 4717(7)  | 7164(5)  | 2439(4)  | 56(1)          |
| C(11)  | 3104(7)  | 967(6)   | 8103(5)  | 66(2)          |
| C(12)  | 4635(9)  | -506(7)  | 8008(8)  | 101(3)         |
| C(13)  | 1234(7)  | 1498(6)  | 5766(5)  | 60(1)          |
| C(14)  | 2218(8)  | 214(6)   | 4838(6)  | 72(2)          |
| C(15)  | 620(7)   | 5033(6)  | 1831(5)  | 63(1)          |
| C(16)  | 1537(8)  | 3665(8)  | 1004(7)  | 96(2)          |
| C(17)  | 2052(13) | 7312(11) | 691(6)   | 57(3)          |
| C(18)  | 3254(13) | 6545(13) | -518(7)  | 73(3)          |
| C(17') | 2570(20) | 7252(12) | 621(9)   | 63(4)          |
| C(18') | 1608(16) | 8903(10) | 869(11)  | 73(4)          |
| O(2)   | 6747(10) | 3399(8)  | 4108(8)  | 44(2)          |
| C(19)  | 7384(16) | 3277(14) | 2871(9)  | 71(3)          |
| C(20)  | 9058(14) | 1995(12) | 2598(11) | 64(3)          |

Table 3. Bond lengths [ $\text{\AA}$ ] and angles [ $^\circ$ ] for (OEP)Os(NO)(OEt).

---

|               |           |
|---------------|-----------|
| Os(1)-O(2)#1  | 1.849(7)  |
| Os(1)-O(2)    | 1.849(7)  |
| Os(1)-N(3)#1  | 1.880(7)  |
| Os(1)-N(3)    | 1.880(7)  |
| Os(1)-N(1)#1  | 2.059(4)  |
| Os(1)-N(1)    | 2.059(4)  |
| Os(1)-N(2)    | 2.066(4)  |
| Os(1)-N(2)#1  | 2.066(4)  |
| N(1)-C(4)     | 1.364(7)  |
| N(1)-C(1)     | 1.372(6)  |
| N(2)-C(6)     | 1.361(7)  |
| N(2)-C(9)     | 1.380(6)  |
| N(3)-O(1)     | 1.165(9)  |
| C(1)-C(10)#1  | 1.385(8)  |
| C(1)-C(2)     | 1.454(8)  |
| C(2)-C(3)     | 1.353(8)  |
| C(2)-C(11)    | 1.508(7)  |
| C(3)-C(4)     | 1.453(7)  |
| C(3)-C(13)    | 1.494(8)  |
| C(4)-C(5)     | 1.391(6)  |
| C(5)-C(6)     | 1.381(7)  |
| C(6)-C(7)     | 1.456(6)  |
| C(7)-C(8)     | 1.354(8)  |
| C(7)-C(15)    | 1.501(8)  |
| C(8)-C(9)     | 1.436(8)  |
| C(8)-C(17)    | 1.534(8)  |
| C(8)-C(17')   | 1.535(9)  |
| C(9)-C(10)    | 1.388(8)  |
| C(10)-C(1)#1  | 1.385(8)  |
| C(11)-C(12)   | 1.515(8)  |
| C(13)-C(14)   | 1.529(7)  |
| C(15)-C(16)   | 1.521(8)  |
| C(17)-C(18)   | 1.532(11) |
| C(17')-C(18') | 1.531(12) |

|                     |            |
|---------------------|------------|
| O(2)-C(19)          | 1.351(12)  |
| C(19)-C(20)         | 1.475(16)  |
| O(2)#1-Os(1)-O(2)   | 180.000(1) |
| O(2)#1-Os(1)-N(3)#1 | 168.4(6)   |
| O(2)-Os(1)-N(3)#1   | 11.6(6)    |
| O(2)#1-Os(1)-N(3)   | 11.6(6)    |
| O(2)-Os(1)-N(3)     | 168.4(6)   |
| N(3)#1-Os(1)-N(3)   | 180.000(1) |
| O(2)#1-Os(1)-N(1)#1 | 85.2(3)    |
| O(2)-Os(1)-N(1)#1   | 94.8(3)    |
| N(3)#1-Os(1)-N(1)#1 | 84.1(3)    |
| N(3)-Os(1)-N(1)#1   | 95.9(3)    |
| O(2)#1-Os(1)-N(1)   | 94.8(3)    |
| O(2)-Os(1)-N(1)     | 85.2(3)    |
| N(3)#1-Os(1)-N(1)   | 95.9(3)    |
| N(3)-Os(1)-N(1)     | 84.1(3)    |
| N(1)#1-Os(1)-N(1)   | 180.000(1) |
| O(2)#1-Os(1)-N(2)   | 90.8(3)    |
| O(2)-Os(1)-N(2)     | 89.2(3)    |
| N(3)#1-Os(1)-N(2)   | 93.7(4)    |
| N(3)-Os(1)-N(2)     | 86.3(4)    |
| N(1)#1-Os(1)-N(2)   | 89.89(16)  |
| N(1)-Os(1)-N(2)     | 90.11(16)  |
| O(2)#1-Os(1)-N(2)#1 | 89.2(3)    |
| O(2)-Os(1)-N(2)#1   | 90.8(3)    |
| N(3)#1-Os(1)-N(2)#1 | 86.3(4)    |
| N(3)-Os(1)-N(2)#1   | 93.7(4)    |
| N(1)#1-Os(1)-N(2)#1 | 90.11(16)  |
| N(1)-Os(1)-N(2)#1   | 89.89(16)  |
| N(2)-Os(1)-N(2)#1   | 180.000(1) |
| C(4)-N(1)-C(1)      | 107.9(4)   |
| C(4)-N(1)-Os(1)     | 125.6(3)   |
| C(1)-N(1)-Os(1)     | 126.4(4)   |
| C(6)-N(2)-C(9)      | 107.7(4)   |
| C(6)-N(2)-Os(1)     | 126.2(3)   |

|                    |           |
|--------------------|-----------|
| C(9)-N(2)-Os(1)    | 126.0(4)  |
| O(1)-N(3)-Os(1)    | 172.4(10) |
| N(1)-C(1)-C(10)#1  | 125.0(5)  |
| N(1)-C(1)-C(2)     | 108.5(5)  |
| C(10)#1-C(1)-C(2)  | 126.6(4)  |
| C(3)-C(2)-C(1)     | 107.6(4)  |
| C(3)-C(2)-C(11)    | 128.0(5)  |
| C(1)-C(2)-C(11)    | 124.4(5)  |
| C(2)-C(3)-C(4)     | 106.8(5)  |
| C(2)-C(3)-C(13)    | 128.7(5)  |
| C(4)-C(3)-C(13)    | 124.4(5)  |
| N(1)-C(4)-C(5)     | 125.3(4)  |
| N(1)-C(4)-C(3)     | 109.2(4)  |
| C(5)-C(4)-C(3)     | 125.5(5)  |
| C(6)-C(5)-C(4)     | 128.0(5)  |
| N(2)-C(6)-C(5)     | 124.8(4)  |
| N(2)-C(6)-C(7)     | 108.7(4)  |
| C(5)-C(6)-C(7)     | 126.5(5)  |
| C(8)-C(7)-C(6)     | 107.1(5)  |
| C(8)-C(7)-C(15)    | 129.1(5)  |
| C(6)-C(7)-C(15)    | 123.8(5)  |
| C(7)-C(8)-C(9)     | 107.5(4)  |
| C(7)-C(8)-C(17)    | 122.0(7)  |
| C(9)-C(8)-C(17)    | 130.4(7)  |
| C(7)-C(8)-C(17')   | 134.8(9)  |
| C(9)-C(8)-C(17')   | 117.2(9)  |
| C(17)-C(8)-C(17')  | 15.8(9)   |
| N(2)-C(9)-C(10)    | 124.7(5)  |
| N(2)-C(9)-C(8)     | 108.9(5)  |
| C(10)-C(9)-C(8)    | 126.4(4)  |
| C(1)#1-C(10)-C(9)  | 127.9(4)  |
| C(2)-C(11)-C(12)   | 113.9(5)  |
| C(3)-C(13)-C(14)   | 112.5(4)  |
| C(7)-C(15)-C(16)   | 112.2(4)  |
| C(18)-C(17)-C(8)   | 111.3(6)  |
| C(18')-C(17')-C(8) | 112.0(7)  |



|                  |           |
|------------------|-----------|
| C(19)-O(2)-Os(1) | 128.0(8)  |
| O(2)-C(19)-C(20) | 109.8(10) |

---

Symmetry transformations used to generate equivalent atoms:

#1  $-x+1, -y+1, -z+1$

Table 4. Anisotropic displacement parameters ( $\text{\AA}^2 \times 10^3$ ) for (OEP)Os(NO)(OEt). The anisotropic displacement factor exponent takes the form:  $-2\sigma^2 [ h^2 a^{*2} U^{11} + \dots + 2 h k a^* b^* U^{12} ]$

|        | $U^{11}$ | $U^{22}$ | $U^{33}$ | $U^{23}$ | $U^{13}$ | $U^{12}$ |
|--------|----------|----------|----------|----------|----------|----------|
| Os(1)  | 90(1)    | 35(1)    | 34(1)    | 11(1)    | -22(1)   | -21(1)   |
| N(1)   | 67(2)    | 31(2)    | 31(2)    | 5(1)     | -8(2)    | -8(2)    |
| N(2)   | 71(2)    | 34(2)    | 26(2)    | 4(1)     | -6(2)    | -4(2)    |
| N(3)   | 64(3)    | 27(2)    | 36(2)    | 5(2)     | -9(2)    | -15(2)   |
| O(1)   | 59(4)    | 51(4)    | 40(4)    | 2(3)     | -7(3)    | -1(3)    |
| C(1)   | 67(3)    | 34(2)    | 31(2)    | 2(2)     | 0(2)     | -6(2)    |
| C(2)   | 65(3)    | 36(2)    | 40(2)    | 3(2)     | 3(2)     | -6(2)    |
| C(3)   | 63(3)    | 36(2)    | 40(2)    | -1(2)    | 3(2)     | -7(2)    |
| C(4)   | 61(3)    | 30(2)    | 33(2)    | -2(2)    | 2(2)     | -2(2)    |
| C(5)   | 59(2)    | 37(2)    | 37(2)    | -3(2)    | -8(2)    | -9(2)    |
| C(6)   | 56(2)    | 36(2)    | 32(2)    | -3(2)    | -6(2)    | -6(2)    |
| C(7)   | 61(3)    | 45(2)    | 34(2)    | -1(2)    | -8(2)    | 0(2)     |
| C(8)   | 75(3)    | 48(3)    | 29(2)    | 3(2)     | -9(2)    | -6(2)    |
| C(9)   | 69(3)    | 37(2)    | 31(2)    | 0(2)     | -6(2)    | -7(2)    |
| C(10)  | 82(3)    | 38(2)    | 29(2)    | 10(2)    | -9(2)    | -10(2)   |
| C(11)  | 70(3)    | 53(3)    | 55(3)    | 17(2)    | 2(2)     | -15(2)   |
| C(12)  | 84(4)    | 62(4)    | 112(6)   | 45(4)    | 15(4)    | -9(3)    |
| C(13)  | 67(3)    | 48(3)    | 48(3)    | 2(2)     | 5(2)     | -17(2)   |
| C(14)  | 84(3)    | 55(3)    | 70(4)    | -9(3)    | 11(3)    | -33(3)   |
| C(15)  | 63(3)    | 60(3)    | 44(3)    | 3(2)     | -18(2)   | -2(2)    |
| C(16)  | 77(3)    | 101(5)   | 88(4)    | -38(4)   | -47(3)   | 5(3)     |
| C(17)  | 56(5)    | 68(5)    | 39(4)    | 10(4)    | -14(3)   | -17(4)   |
| C(18)  | 76(5)    | 84(6)    | 45(5)    | 2(4)     | -12(4)   | -20(5)   |
| C(17') | 64(7)    | 78(6)    | 41(5)    | 30(5)    | -23(4)   | -22(5)   |
| C(18') | 60(6)    | 86(8)    | 61(7)    | 47(6)    | -18(5)   | -24(5)   |
| O(2)   | 64(3)    | 27(2)    | 36(2)    | 5(2)     | -9(2)    | -15(2)   |
| C(19)  | 88(7)    | 77(7)    | 47(6)    | -6(5)    | -1(5)    | -39(6)   |
| C(20)  | 71(6)    | 57(6)    | 58(6)    | 1(5)     | 5(5)     | -30(5)   |

Table 5. Hydrogen coordinates ( $\times 10^4$ ) and isotropic displacement parameters ( $\text{\AA}^2 \times 10^{-3}$ ) for (OEP)Os(NO)(OEt).

|        | x    | y     | z     | U(eq) |
|--------|------|-------|-------|-------|
| H(5)   | 1391 | 3506  | 3970  | 58    |
| H(10)  | 4660 | 7749  | 1720  | 67    |
| H(11A) | 2035 | 807   | 8197  | 79    |
| H(11B) | 3020 | 1490  | 8860  | 79    |
| H(12A) | 4522 | -1040 | 8776  | 152   |
| H(12B) | 5704 | -361  | 7883  | 152   |
| H(12C) | 4668 | -1069 | 7303  | 152   |
| H(13A) | 266  | 2247  | 5424  | 71    |
| H(13B) | 737  | 1151  | 6549  | 71    |
| H(14A) | 1428 | -194  | 4685  | 108   |
| H(14B) | 3161 | -542  | 5180  | 108   |
| H(14C) | 2695 | 555   | 4056  | 108   |
| H(15A) | -78  | 5854  | 1354  | 76    |
| H(15B) | -179 | 4865  | 2545  | 76    |
| H(16A) | 680  | 3443  | 707   | 143   |
| H(16B) | 2199 | 2842  | 1480  | 143   |
| H(16C) | 2322 | 3829  | 291   | 143   |
| H(17A) | 849  | 7496  | 659   | 69    |
| H(17B) | 2096 | 8268  | 776   | 69    |
| H(18A) | 4458 | 6250  | -446  | 109   |
| H(18B) | 2999 | 7216  | -1210 | 109   |
| H(18C) | 3073 | 5677  | -671  | 109   |
| H(17C) | 3783 | 7023  | 200   | 76    |
| H(17D) | 2026 | 6945  | 57    | 76    |
| H(18D) | 1432 | 9403  | 81    | 109   |
| H(18E) | 2288 | 9247  | 1268  | 109   |
| H(18F) | 485  | 9116  | 1418  | 109   |
| H(19A) | 7539 | 4173  | 2575  | 85    |
| H(19B) | 6559 | 3167  | 2429  | 85    |
| H(20A) | 9500 | 1898  | 1698  | 95    |

|        |      |      |      |    |
|--------|------|------|------|----|
| H(20B) | 8902 | 1112 | 2902 | 95 |
| H(20C) | 9883 | 2123 | 3012 | 95 |

---

Table 6. Torsion angles [°] for (OEP)Os(NO)(OEt).

|                         |           |
|-------------------------|-----------|
| O(2)#1-Os(1)-N(1)-C(4)  | 89.9(4)   |
| O(2)-Os(1)-N(1)-C(4)    | -90.1(4)  |
| N(3)#1-Os(1)-N(1)-C(4)  | -94.7(5)  |
| N(3)-Os(1)-N(1)-C(4)    | 85.3(5)   |
| N(2)-Os(1)-N(1)-C(4)    | -0.9(3)   |
| N(2)#1-Os(1)-N(1)-C(4)  | 179.1(3)  |
| O(2)#1-Os(1)-N(1)-C(1)  | -87.4(4)  |
| O(2)-Os(1)-N(1)-C(1)    | 92.6(4)   |
| N(3)#1-Os(1)-N(1)-C(1)  | 88.1(5)   |
| N(3)-Os(1)-N(1)-C(1)    | -91.9(5)  |
| N(2)-Os(1)-N(1)-C(1)    | -178.1(3) |
| N(2)#1-Os(1)-N(1)-C(1)  | 1.9(3)    |
| O(2)#1-Os(1)-N(2)-C(6)  | -93.0(4)  |
| O(2)-Os(1)-N(2)-C(6)    | 87.0(4)   |
| N(3)#1-Os(1)-N(2)-C(6)  | 97.6(5)   |
| N(3)-Os(1)-N(2)-C(6)    | -82.4(5)  |
| N(1)#1-Os(1)-N(2)-C(6)  | -178.3(3) |
| N(1)-Os(1)-N(2)-C(6)    | 1.7(3)    |
| O(2)#1-Os(1)-N(2)-C(9)  | 85.1(4)   |
| O(2)-Os(1)-N(2)-C(9)    | -94.9(4)  |
| N(3)#1-Os(1)-N(2)-C(9)  | -84.2(5)  |
| N(3)-Os(1)-N(2)-C(9)    | 95.8(5)   |
| N(1)#1-Os(1)-N(2)-C(9)  | -0.1(3)   |
| N(1)-Os(1)-N(2)-C(9)    | 179.9(3)  |
| C(4)-N(1)-C(1)-C(10)#1  | -179.8(4) |
| Os(1)-N(1)-C(1)-C(10)#1 | -2.2(6)   |
| C(4)-N(1)-C(1)-C(2)     | 0.9(5)    |
| Os(1)-N(1)-C(1)-C(2)    | 178.5(3)  |
| N(1)-C(1)-C(2)-C(3)     | 0.0(5)    |
| C(10)#1-C(1)-C(2)-C(3)  | -179.3(4) |
| N(1)-C(1)-C(2)-C(11)    | -178.1(4) |
| C(10)#1-C(1)-C(2)-C(11) | 2.6(7)    |
| C(1)-C(2)-C(3)-C(4)     | -0.9(5)   |
| C(11)-C(2)-C(3)-C(4)    | 177.2(4)  |

|                        |           |
|------------------------|-----------|
| C(1)-C(2)-C(3)-C(13)   | 176.2(4)  |
| C(11)-C(2)-C(3)-C(13)  | -5.8(8)   |
| C(1)-N(1)-C(4)-C(5)    | 177.7(4)  |
| Os(1)-N(1)-C(4)-C(5)   | 0.0(6)    |
| C(1)-N(1)-C(4)-C(3)    | -1.4(5)   |
| Os(1)-N(1)-C(4)-C(3)   | -179.0(3) |
| C(2)-C(3)-C(4)-N(1)    | 1.4(5)    |
| C(13)-C(3)-C(4)-N(1)   | -175.8(4) |
| C(2)-C(3)-C(4)-C(5)    | -177.7(4) |
| C(13)-C(3)-C(4)-C(5)   | 5.1(7)    |
| N(1)-C(4)-C(5)-C(6)    | 0.6(7)    |
| C(3)-C(4)-C(5)-C(6)    | 179.5(4)  |
| C(9)-N(2)-C(6)-C(5)    | 179.8(4)  |
| Os(1)-N(2)-C(6)-C(5)   | -1.8(6)   |
| C(9)-N(2)-C(6)-C(7)    | -0.4(5)   |
| Os(1)-N(2)-C(6)-C(7)   | 178.1(3)  |
| C(4)-C(5)-C(6)-N(2)    | 0.4(7)    |
| C(4)-C(5)-C(6)-C(7)    | -179.4(4) |
| N(2)-C(6)-C(7)-C(8)    | 0.1(5)    |
| C(5)-C(6)-C(7)-C(8)    | 179.9(4)  |
| N(2)-C(6)-C(7)-C(15)   | 178.6(4)  |
| C(5)-C(6)-C(7)-C(15)   | -1.5(7)   |
| C(6)-C(7)-C(8)-C(9)    | 0.2(5)    |
| C(15)-C(7)-C(8)-C(9)   | -178.2(4) |
| C(6)-C(7)-C(8)-C(17)   | -176.3(5) |
| C(15)-C(7)-C(8)-C(17)  | 5.2(8)    |
| C(6)-C(7)-C(8)-C(17')  | 171.7(8)  |
| C(15)-C(7)-C(8)-C(17') | -6.8(10)  |
| C(6)-N(2)-C(9)-C(10)   | -179.5(4) |
| Os(1)-N(2)-C(9)-C(10)  | 2.1(6)    |
| C(6)-N(2)-C(9)-C(8)    | 0.5(5)    |
| Os(1)-N(2)-C(9)-C(8)   | -177.9(3) |
| C(7)-C(8)-C(9)-N(2)    | -0.5(5)   |
| C(17)-C(8)-C(9)-N(2)   | 175.7(5)  |
| C(17')-C(8)-C(9)-N(2)  | -173.7(6) |
| C(7)-C(8)-C(9)-C(10)   | 179.6(4)  |

|                          |            |
|--------------------------|------------|
| C(17)-C(8)-C(9)-C(10)    | -4.3(8)    |
| C(17')-C(8)-C(9)-C(10)   | 6.4(8)     |
| N(2)-C(9)-C(10)-C(1)#1   | -2.4(8)    |
| C(8)-C(9)-C(10)-C(1)#1   | 177.5(4)   |
| C(3)-C(2)-C(11)-C(12)    | 102.1(7)   |
| C(1)-C(2)-C(11)-C(12)    | -80.2(8)   |
| C(2)-C(3)-C(13)-C(14)    | -95.7(6)   |
| C(4)-C(3)-C(13)-C(14)    | 80.9(6)    |
| C(8)-C(7)-C(15)-C(16)    | 93.4(7)    |
| C(6)-C(7)-C(15)-C(16)    | -84.8(6)   |
| C(7)-C(8)-C(17)-C(18)    | -93.2(10)  |
| C(9)-C(8)-C(17)-C(18)    | 91.2(11)   |
| C(17')-C(8)-C(17)-C(18)  | 54(3)      |
| C(7)-C(8)-C(17')-C(18')  | 113.3(12)  |
| C(9)-C(8)-C(17')-C(18')  | -75.8(14)  |
| C(17)-C(8)-C(17')-C(18') | 73(3)      |
| N(3)#1-Os(1)-O(2)-C(19)  | -74(3)     |
| N(3)-Os(1)-O(2)-C(19)    | 106(3)     |
| N(1)#1-Os(1)-O(2)-C(19)  | -51.0(11)  |
| N(1)-Os(1)-O(2)-C(19)    | 129.0(11)  |
| N(2)-Os(1)-O(2)-C(19)    | 38.8(11)   |
| N(2)#1-Os(1)-O(2)-C(19)  | -141.2(11) |
| Os(1)-O(2)-C(19)-C(20)   | 164.2(8)   |

---

Symmetry transformations used to generate equivalent atoms:

#1 -x+1,-y+1,-z+1

Table 1. Crystal data and structure refinement for (OEP)Os(NO)(SEt).0.5(CH<sub>2</sub>Cl<sub>2</sub>).

|                                             |                                                                                               |                |
|---------------------------------------------|-----------------------------------------------------------------------------------------------|----------------|
| Empirical formula                           | (C <sub>38</sub> H <sub>49</sub> N <sub>5</sub> O Os S) · (C H <sub>2</sub> Cl <sub>2</sub> ) |                |
|                                             | C <sub>38.5</sub> H <sub>50</sub> Cl N <sub>5</sub> O Os S                                    |                |
| Formula weight                              | 856.55                                                                                        |                |
| Crystal system                              | Monoclinic                                                                                    |                |
| Space group                                 | <i>P</i> 2 <sub>1</sub> / <i>n</i>                                                            |                |
| Unit cell dimensions                        | <i>a</i> = 8.2803(10) Å                                                                       | ∠ = 90°        |
|                                             | <i>b</i> = 10.4219(13) Å                                                                      | ∠ = 91.823(3)° |
|                                             | <i>c</i> = 22.157(3) Å                                                                        | ∠ = 90°        |
| Volume                                      | 1911.1(4) Å <sup>3</sup>                                                                      |                |
| Z, Z'                                       | 2, 0.5                                                                                        |                |
| Density (calculated)                        | 1.488 Mg/m <sup>3</sup>                                                                       |                |
| Wavelength                                  | 0.71073 Å                                                                                     |                |
| Temperature                                 | 100(2) K                                                                                      |                |
| <i>F</i> (000)                              | 866                                                                                           |                |
| Absorption coefficient                      | 3.497 mm <sup>-1</sup>                                                                        |                |
| Absorption correction                       | Semi-empirical from equivalents                                                               |                |
| Max. and min. transmission                  | 0.8446 and 0.3282                                                                             |                |
| Theta range for data collection             | 2.60 to 30.00°                                                                                |                |
| Reflections collected                       | 15569                                                                                         |                |
| Independent reflections                     | 5373 [R(int) = 0.0260]                                                                        |                |
| Data / restraints / parameters              | 5373 / 23 / 271                                                                               |                |
| <i>wR</i> ( <i>F</i> <sup>2</sup> all data) | <i>wR</i> 2 = 0.0798                                                                          |                |
| <i>R</i> ( <i>F</i> obsd data)              | <i>R</i> 1 = 0.0370                                                                           |                |
| Goodness-of-fit on <i>F</i> <sup>2</sup>    | 1.097                                                                                         |                |
| Observed data [I > 2s(I)]                   | 4902                                                                                          |                |
| Largest and mean shift / s.u.               | 0.006 and 0.000                                                                               |                |
| Largest diff. peak and hole                 | 1.634 and -3.063 e/Å <sup>3</sup>                                                             |                |

-----

$$wR2 = \{ \sum [w(F_o^2 - F_c^2)^2] / \sum [w(F_o^2)^2] \}^{1/2}$$

$$R1 = \sum ||F_o| - |F_c|| / \sum |F_o|$$



Table 2. Atomic coordinates and equivalent isotropic displacement parameters for (OEP)Os(NO)(SEt).0.5(CH<sub>2</sub>Cl<sub>2</sub>). U(eq) is defined as one third of the trace of the orthogonalized U<sub>ij</sub> tensor.

|        | x          | y           | z           | U(eq)      |
|--------|------------|-------------|-------------|------------|
| Os(1)  | 0.5000     | 0.5000      | 0.5000      | 0.02841(6) |
| S(1)   | 0.6149(3)  | 0.6853(2)   | 0.52717(11) | 0.0251(4)  |
| N(1)   | 0.3444(3)  | 0.5175(2)   | 0.56956(12) | 0.0227(5)  |
| N(2)   | 0.3389(3)  | 0.5970(2)   | 0.44425(12) | 0.0226(5)  |
| N(3)   | 0.3742(13) | 0.3461(9)   | 0.4827(5)   | 0.0251(4)  |
| O(1)   | 0.2867(6)  | 0.2637(5)   | 0.4740(2)   | 0.0338(11) |
| C(1)   | 0.3687(4)  | 0.4714(3)   | 0.62684(14) | 0.0214(6)  |
| C(2)   | 0.2292(4)  | 0.4998(3)   | 0.66186(13) | 0.0218(5)  |
| C(3)   | 0.1224(4)  | 0.5641(3)   | 0.62472(14) | 0.0225(6)  |
| C(4)   | 0.1950(4)  | 0.5738(3)   | 0.56668(14) | 0.0229(6)  |
| C(5)   | 0.1250(4)  | 0.6296(3)   | 0.51551(14) | 0.0245(6)  |
| C(6)   | 0.1907(4)  | 0.6411(3)   | 0.45935(14) | 0.0231(6)  |
| C(7)   | 0.1133(4)  | 0.7015(3)   | 0.40729(14) | 0.0227(6)  |
| C(8)   | 0.2179(4)  | 0.6927(3)   | 0.36127(14) | 0.0225(6)  |
| C(9)   | 0.3602(4)  | 0.6260(3)   | 0.38477(14) | 0.0224(6)  |
| C(10)  | 0.4948(4)  | 0.5951(3)   | 0.35275(14) | 0.0233(6)  |
| C(11)  | 0.2091(4)  | 0.4646(3)   | 0.72668(14) | 0.0238(6)  |
| C(12)  | 0.2879(5)  | 0.5593(4)   | 0.77044(16) | 0.0365(8)  |
| C(13)  | -0.0377(4) | 0.6182(3)   | 0.63949(15) | 0.0248(6)  |
| C(14)  | -0.0319(5) | 0.7621(3)   | 0.65184(19) | 0.0356(8)  |
| C(15)  | -0.0490(4) | 0.7635(3)   | 0.40721(15) | 0.0251(6)  |
| C(16)  | -0.0442(5) | 0.8956(3)   | 0.43687(18) | 0.0357(8)  |
| C(17)  | 0.1948(4)  | 0.7423(3)   | 0.29837(15) | 0.0261(6)  |
| C(18)  | 0.2549(5)  | 0.8789(4)   | 0.29134(19) | 0.0388(9)  |
| C(19)  | 0.4726(12) | 0.8033(10)  | 0.5470(7)   | 0.067(3)   |
| C(20)  | 0.5467(16) | 0.9266(13)  | 0.5765(7)   | 0.078(4)   |
| Cl(1S) | 0.408(3)   | -0.069(2)   | 0.4926(11)  | 0.262(9)   |
| C(1S)  | 0.493(4)   | -0.028(3)   | 0.5617(10)  | 0.104(9)   |
| Cl(2S) | 0.4443(18) | -0.1346(17) | 0.6174(7)   | 0.164(5)   |
| Cl(1T) | 0.5140(6)  | 0.1965(5)   | 0.3533(2)   | 0.0484(13) |
| C(1T)  | 0.586(5)   | 0.1044(18)  | 0.4127(14)  | 0.104(9)   |
| Cl(2T) | 0.5077(7)  | -0.0482(6)  | 0.4168(3)   | 0.0609(16) |

Table 3. Bond lengths [ $\text{\AA}$ ] and angles [ $^\circ$ ] for (OEP)Os(NO)(SEt).0.5(CH<sub>2</sub>Cl<sub>2</sub>).

|                     |            |                   |            |
|---------------------|------------|-------------------|------------|
| Os(1)-N(3)          | 1.944(10)  | C(12)-H(12C)      | 0.9800     |
| Os(1)-N(1)          | 2.048(3)   | C(13)-C(14)       | 1.525(5)   |
| Os(1)-N(1)#1        | 2.048(3)   | C(13)-H(13A)      | 0.9900     |
| Os(1)-N(2)#1        | 2.054(2)   | C(13)-H(13B)      | 0.9900     |
| Os(1)-N(2)          | 2.054(2)   | C(14)-H(14A)      | 0.9800     |
| Os(1)-S(1)          | 2.227(2)   | C(14)-H(14B)      | 0.9800     |
| S(1)-C(19)          | 1.768(10)  | C(14)-H(14C)      | 0.9800     |
| N(1)-C(1)           | 1.366(4)   | C(15)-C(16)       | 1.525(5)   |
| N(1)-C(4)           | 1.369(4)   | C(15)-H(15A)      | 0.9900     |
| N(2)-C(6)           | 1.363(4)   | C(15)-H(15B)      | 0.9900     |
| N(2)-C(9)           | 1.369(4)   | C(16)-H(16A)      | 0.9800     |
| N(3)-O(1)           | 1.136(11)  | C(16)-H(16B)      | 0.9800     |
| C(1)-C(10)#1        | 1.389(4)   | C(16)-H(16C)      | 0.9800     |
| C(1)-C(2)           | 1.443(5)   | C(17)-C(18)       | 1.518(5)   |
| C(2)-C(3)           | 1.365(4)   | C(17)-H(17A)      | 0.9900     |
| C(2)-C(11)          | 1.497(4)   | C(17)-H(17B)      | 0.9900     |
| C(3)-C(4)           | 1.440(5)   | C(18)-H(18A)      | 0.9800     |
| C(3)-C(13)          | 1.486(5)   | C(18)-H(18B)      | 0.9800     |
| C(4)-C(5)           | 1.385(4)   | C(18)-H(18C)      | 0.9800     |
| C(5)-C(6)           | 1.379(5)   | C(19)-C(20)       | 1.559(16)  |
| C(5)-H(5)           | 0.9500     | C(19)-H(19A)      | 0.9900     |
| C(6)-C(7)           | 1.446(4)   | C(19)-H(19B)      | 0.9900     |
| C(7)-C(8)           | 1.362(5)   | C(20)-H(20A)      | 0.9800     |
| C(7)-C(15)          | 1.491(4)   | C(20)-H(20B)      | 0.9800     |
| C(8)-C(9)           | 1.451(4)   | C(20)-H(20C)      | 0.9800     |
| C(8)-C(17)          | 1.493(4)   | Cl(1S)-C(1S)      | 1.719(3)   |
| C(9)-C(10)          | 1.378(5)   | C(1S)-Cl(2S)      | 1.720(3)   |
| C(10)-C(1)#1        | 1.389(4)   | C(1S)-H(1S1)      | 0.9900     |
| C(10)-H(10)         | 0.9500     | C(1S)-H(1S2)      | 0.9900     |
| C(11)-C(12)         | 1.517(4)   | Cl(1T)-C(1T)      | 1.721(3)   |
| C(11)-H(11A)        | 0.9900     | C(1T)-Cl(2T)      | 1.720(3)   |
| C(11)-H(11B)        | 0.9900     | C(1T)-H(1T1)      | 0.9900     |
| C(12)-H(12A)        | 0.9800     | C(1T)-H(1T2)      | 0.9900     |
| C(12)-H(12B)        | 0.9800     |                   |            |
| N(3)-Os(1)-N(1)     | 82.9(3)    | N(1)-Os(1)-N(2)   | 89.82(10)  |
| N(3)-Os(1)-N(1)#1   | 97.1(3)    | N(1)#1-Os(1)-N(2) | 90.18(10)  |
| N(1)-Os(1)-N(1)#1   | 180.000(1) | N(2)#1-Os(1)-N(2) | 180.00(12) |
| N(3)-Os(1)-N(2)#1   | 92.7(3)    | N(3)-Os(1)-S(1)   | 172.0(3)   |
| N(1)-Os(1)-N(2)#1   | 90.18(10)  | N(1)-Os(1)-S(1)   | 89.58(10)  |
| N(1)#1-Os(1)-N(2)#1 | 89.82(10)  | N(1)#1-Os(1)-S(1) | 90.42(10)  |
| N(3)-Os(1)-N(2)     | 87.3(3)    | N(2)#1-Os(1)-S(1) | 90.02(10)  |

|                     |           |                     |          |
|---------------------|-----------|---------------------|----------|
| N(2)-Os(1)-S(1)     | 89.98(10) | C(11)-C(12)-H(12A)  | 109.5    |
| C(19)-S(1)-Os(1)    | 112.8(4)  | C(11)-C(12)-H(12B)  | 109.5    |
| C(1)-N(1)-C(4)      | 107.5(3)  | H(12A)-C(12)-H(12B) | 109.5    |
| C(1)-N(1)-Os(1)     | 126.2(2)  | C(11)-C(12)-H(12C)  | 109.5    |
| C(4)-N(1)-Os(1)     | 126.3(2)  | H(12A)-C(12)-H(12C) | 109.5    |
| C(6)-N(2)-C(9)      | 107.8(3)  | H(12B)-C(12)-H(12C) | 109.5    |
| C(6)-N(2)-Os(1)     | 126.2(2)  | C(3)-C(13)-C(14)    | 112.9(3) |
| C(9)-N(2)-Os(1)     | 125.9(2)  | C(3)-C(13)-H(13A)   | 109.0    |
| O(1)-N(3)-Os(1)     | 172.7(8)  | C(14)-C(13)-H(13A)  | 109.0    |
| N(1)-C(1)-C(10)#1   | 124.9(3)  | C(3)-C(13)-H(13B)   | 109.0    |
| N(1)-C(1)-C(2)      | 109.3(3)  | C(14)-C(13)-H(13B)  | 109.0    |
| C(10)#1-C(1)-C(2)   | 125.8(3)  | H(13A)-C(13)-H(13B) | 107.8    |
| C(3)-C(2)-C(1)      | 106.9(3)  | C(13)-C(14)-H(14A)  | 109.5    |
| C(3)-C(2)-C(11)     | 127.6(3)  | C(13)-C(14)-H(14B)  | 109.5    |
| C(1)-C(2)-C(11)     | 125.5(3)  | H(14A)-C(14)-H(14B) | 109.5    |
| C(2)-C(3)-C(4)      | 106.9(3)  | C(13)-C(14)-H(14C)  | 109.5    |
| C(2)-C(3)-C(13)     | 128.2(3)  | H(14A)-C(14)-H(14C) | 109.5    |
| C(4)-C(3)-C(13)     | 124.8(3)  | H(14B)-C(14)-H(14C) | 109.5    |
| N(1)-C(4)-C(5)      | 124.9(3)  | C(7)-C(15)-C(16)    | 112.3(3) |
| N(1)-C(4)-C(3)      | 109.3(3)  | C(7)-C(15)-H(15A)   | 109.1    |
| C(5)-C(4)-C(3)      | 125.7(3)  | C(16)-C(15)-H(15A)  | 109.1    |
| C(6)-C(5)-C(4)      | 127.5(3)  | C(7)-C(15)-H(15B)   | 109.1    |
| C(6)-C(5)-H(5)      | 116.3     | C(16)-C(15)-H(15B)  | 109.1    |
| C(4)-C(5)-H(5)      | 116.3     | H(15A)-C(15)-H(15B) | 107.9    |
| N(2)-C(6)-C(5)      | 125.2(3)  | C(15)-C(16)-H(16A)  | 109.5    |
| N(2)-C(6)-C(7)      | 109.3(3)  | C(15)-C(16)-H(16B)  | 109.4    |
| C(5)-C(6)-C(7)      | 125.5(3)  | H(16A)-C(16)-H(16B) | 109.5    |
| C(8)-C(7)-C(6)      | 107.0(3)  | C(15)-C(16)-H(16C)  | 109.5    |
| C(8)-C(7)-C(15)     | 128.5(3)  | H(16A)-C(16)-H(16C) | 109.5    |
| C(6)-C(7)-C(15)     | 124.5(3)  | H(16B)-C(16)-H(16C) | 109.5    |
| C(7)-C(8)-C(9)      | 107.0(3)  | C(8)-C(17)-C(18)    | 112.8(3) |
| C(7)-C(8)-C(17)     | 127.6(3)  | C(8)-C(17)-H(17A)   | 109.0    |
| C(9)-C(8)-C(17)     | 125.4(3)  | C(18)-C(17)-H(17A)  | 109.0    |
| N(2)-C(9)-C(10)     | 125.1(3)  | C(8)-C(17)-H(17B)   | 109.0    |
| N(2)-C(9)-C(8)      | 108.9(3)  | C(18)-C(17)-H(17B)  | 109.0    |
| C(10)-C(9)-C(8)     | 126.0(3)  | H(17A)-C(17)-H(17B) | 107.8    |
| C(9)-C(10)-C(1)#1   | 127.7(3)  | C(17)-C(18)-H(18A)  | 109.5    |
| C(9)-C(10)-H(10)    | 116.1     | C(17)-C(18)-H(18B)  | 109.5    |
| C(1)#1-C(10)-H(10)  | 116.1     | H(18A)-C(18)-H(18B) | 109.5    |
| C(2)-C(11)-C(12)    | 113.3(3)  | C(17)-C(18)-H(18C)  | 109.5    |
| C(2)-C(11)-H(11A)   | 108.9     | H(18A)-C(18)-H(18C) | 109.5    |
| C(12)-C(11)-H(11A)  | 108.9     | H(18B)-C(18)-H(18C) | 109.5    |
| C(2)-C(11)-H(11B)   | 108.9     | C(20)-C(19)-S(1)    | 114.9(8) |
| C(12)-C(11)-H(11B)  | 108.9     | C(20)-C(19)-H(19A)  | 108.5    |
| H(11A)-C(11)-H(11B) | 107.7     | S(1)-C(19)-H(19A)   | 108.5    |

|                     |           |                     |          |
|---------------------|-----------|---------------------|----------|
| C(20)-C(19)-H(19B)  | 108.5     | Cl(2S)-C(1S)-H(1S1) | 109.2    |
| S(1)-C(19)-H(19B)   | 108.5     | Cl(1S)-C(1S)-H(1S2) | 109.2    |
| H(19A)-C(19)-H(19B) | 107.5     | Cl(2S)-C(1S)-H(1S2) | 109.2    |
| C(19)-C(20)-H(20A)  | 111.6     | H(1S1)-C(1S)-H(1S2) | 107.9    |
| C(19)-C(20)-H(20B)  | 107.7     | Cl(2T)-C(1T)-Cl(1T) | 115.7(6) |
| H(20A)-C(20)-H(20B) | 109.5     | Cl(2T)-C(1T)-H(1T1) | 108.4    |
| C(19)-C(20)-H(20C)  | 109.1     | Cl(1T)-C(1T)-H(1T1) | 108.4    |
| H(20A)-C(20)-H(20C) | 109.5     | Cl(2T)-C(1T)-H(1T2) | 108.3    |
| H(20B)-C(20)-H(20C) | 109.5     | Cl(1T)-C(1T)-H(1T2) | 108.3    |
| Cl(1S)-C(1S)-Cl(2S) | 112.2(17) | H(1T1)-C(1T)-H(1T2) | 107.4    |
| Cl(1S)-C(1S)-H(1S1) | 109.2     |                     |          |

---

Symmetry transformations used to generate equivalent atoms:

#1 -x+1, -y+1, -z+1

Table 4. Anisotropic displacement parameters ( $\text{\AA}^2 \times 10^3$ ) for (OEP)Os(NO)(SEt).0.5(CH<sub>2</sub>Cl<sub>2</sub>). The anisotropic displacement factor exponent takes the form:  $-2 \sigma^2 [ h^2 a^{*2} U_{11} + \dots + 2 h k a^* b^* U_{12} ]$

|        | U <sub>11</sub> | U <sub>22</sub> | U <sub>33</sub> | U <sub>23</sub> | U <sub>13</sub> | U <sub>12</sub> |
|--------|-----------------|-----------------|-----------------|-----------------|-----------------|-----------------|
| Os(1)  | 43(1)           | 30(1)           | 12(1)           | -1(1)           | -4(1)           | 21(1)           |
| S(1)   | 24(1)           | 28(1)           | 24(1)           | -4(1)           | -1(1)           | 1(1)            |
| N(1)   | 32(1)           | 19(1)           | 16(1)           | -1(1)           | -7(1)           | 6(1)            |
| N(2)   | 33(1)           | 20(1)           | 15(1)           | -1(1)           | -6(1)           | 4(1)            |
| N(3)   | 24(1)           | 28(1)           | 24(1)           | -4(1)           | -1(1)           | 1(1)            |
| O(1)   | 36(3)           | 32(3)           | 33(3)           | -2(2)           | -1(2)           | -5(2)           |
| C(1)   | 32(2)           | 17(1)           | 15(1)           | -1(1)           | -6(1)           | -1(1)           |
| C(2)   | 31(1)           | 18(1)           | 16(1)           | -2(1)           | -6(1)           | -3(1)           |
| C(3)   | 31(2)           | 18(1)           | 18(1)           | -3(1)           | -5(1)           | 1(1)            |
| C(4)   | 32(2)           | 19(1)           | 18(1)           | -3(1)           | -5(1)           | 4(1)            |
| C(5)   | 35(2)           | 21(1)           | 18(1)           | -3(1)           | -6(1)           | 6(1)            |
| C(6)   | 35(2)           | 18(1)           | 16(1)           | -1(1)           | -8(1)           | 5(1)            |
| C(7)   | 34(2)           | 16(1)           | 17(1)           | 0(1)            | -9(1)           | 1(1)            |
| C(8)   | 31(2)           | 17(1)           | 19(1)           | 1(1)            | -8(1)           | 0(1)            |
| C(9)   | 32(2)           | 19(1)           | 16(1)           | 1(1)            | -9(1)           | 1(1)            |
| C(10)  | 33(2)           | 20(1)           | 16(1)           | 2(1)            | -8(1)           | -1(1)           |
| C(11)  | 32(2)           | 23(1)           | 17(1)           | 1(1)            | -5(1)           | -4(1)           |
| C(12)  | 57(2)           | 33(2)           | 19(2)           | -3(1)           | -6(2)           | -14(2)          |
| C(13)  | 31(2)           | 23(1)           | 20(1)           | 0(1)            | -4(1)           | 1(1)            |
| C(14)  | 40(2)           | 26(2)           | 40(2)           | -8(2)           | 3(2)            | 5(1)            |
| C(15)  | 34(2)           | 21(1)           | 20(1)           | 0(1)            | -8(1)           | 4(1)            |
| C(16)  | 47(2)           | 22(2)           | 38(2)           | -4(1)           | -6(2)           | 8(1)            |
| C(17)  | 30(2)           | 28(2)           | 21(1)           | 7(1)            | -6(1)           | 1(1)            |
| C(18)  | 41(2)           | 37(2)           | 39(2)           | 15(2)           | 2(2)            | -6(2)           |
| C(19)  | 45(5)           | 40(5)           | 117(11)         | -20(6)          | 1(6)            | 1(4)            |
| C(20)  | 71(7)           | 62(6)           | 99(8)           | 15(6)           | -28(6)          | -21(5)          |
| Cl(1S) | 260(13)         | 252(13)         | 277(14)         | 26(11)          | 41(10)          | 8(10)           |
| Cl(2S) | 138(8)          | 198(10)         | 158(9)          | -32(8)          | 36(7)           | 15(8)           |
| Cl(1T) | 51(3)           | 49(3)           | 47(3)           | -5(2)           | 7(2)            | -4(2)           |
| Cl(2T) | 65(3)           | 69(4)           | 48(3)           | 0(3)            | -7(2)           | -17(3)          |

Table 5. Hydrogen coordinates and isotropic displacement parameters for (OEP)Os(NO)(SEt).0.5(CH<sub>2</sub>Cl<sub>2</sub>).

|        | x       | y       | z      | U(eq) |
|--------|---------|---------|--------|-------|
| H(5)   | 0.0195  | 0.6638  | 0.5196 | 0.029 |
| H(10)  | 0.4941  | 0.6226  | 0.3119 | 0.028 |
| H(11A) | 0.2565  | 0.3786  | 0.7340 | 0.029 |
| H(11B) | 0.0923  | 0.4593  | 0.7347 | 0.029 |
| H(12A) | 0.2705  | 0.5314  | 0.8120 | 0.055 |
| H(12B) | 0.2400  | 0.6444  | 0.7641 | 0.055 |
| H(12C) | 0.4041  | 0.5634  | 0.7635 | 0.055 |
| H(13A) | -0.0780 | 0.5737  | 0.6755 | 0.030 |
| H(13B) | -0.1151 | 0.6015  | 0.6054 | 0.030 |
| H(14A) | -0.1403 | 0.7928  | 0.6609 | 0.053 |
| H(14B) | 0.0067  | 0.8069  | 0.6162 | 0.053 |
| H(14C) | 0.0418  | 0.7791  | 0.6864 | 0.053 |
| H(15A) | -0.1244 | 0.7077  | 0.4290 | 0.030 |
| H(15B) | -0.0907 | 0.7721  | 0.3650 | 0.030 |
| H(16A) | -0.1532 | 0.9322  | 0.4362 | 0.054 |
| H(16B) | 0.0278  | 0.9519  | 0.4147 | 0.054 |
| H(16C) | -0.0039 | 0.8874  | 0.4788 | 0.054 |
| H(17A) | 0.0785  | 0.7389  | 0.2867 | 0.031 |
| H(17B) | 0.2531  | 0.6858  | 0.2705 | 0.031 |
| H(18A) | 0.2332  | 0.9078  | 0.2498 | 0.058 |
| H(18B) | 0.3714  | 0.8820  | 0.3004 | 0.058 |
| H(18C) | 0.1988  | 0.9352  | 0.3193 | 0.058 |
| H(19A) | 0.4094  | 0.8285  | 0.5102 | 0.081 |
| H(19B) | 0.3965  | 0.7647  | 0.5754 | 0.081 |
| H(20A) | 0.6576  | 0.9119  | 0.5918 | 0.116 |
| H(20B) | 0.4787  | 0.9509  | 0.6101 | 0.116 |
| H(20C) | 0.5461  | 0.9957  | 0.5465 | 0.116 |
| H(1S1) | 0.4544  | 0.0589  | 0.5728 | 0.125 |
| H(1S2) | 0.6116  | -0.0240 | 0.5587 | 0.125 |
| H(1T1) | 0.7048  | 0.0977  | 0.4101 | 0.125 |
| H(1T2) | 0.5633  | 0.1497  | 0.4508 | 0.125 |

Table 6. Torsion angles [°] for (OEP)Os(NO)(SEt).0.5(CH<sub>2</sub>Cl<sub>2</sub>)

|                         |           |
|-------------------------|-----------|
| N(3)-Os(1)-S(1)-C(19)   | -22(3)    |
| N(1)-Os(1)-S(1)-C(19)   | -41.9(6)  |
| N(1)#1-Os(1)-S(1)-C(19) | 138.1(6)  |
| N(2)#1-Os(1)-S(1)-C(19) | -132.1(6) |
| N(2)-Os(1)-S(1)-C(19)   | 47.9(6)   |
| N(3)-Os(1)-N(1)-C(1)    | 92.0(4)   |
| N(1)#1-Os(1)-N(1)-C(1)  | 130(100)  |
| N(2)#1-Os(1)-N(1)-C(1)  | -0.7(3)   |
| N(2)-Os(1)-N(1)-C(1)    | 179.3(3)  |
| S(1)-Os(1)-N(1)-C(1)    | -90.7(3)  |
| N(3)-Os(1)-N(1)-C(4)    | -85.7(4)  |
| N(1)#1-Os(1)-N(1)-C(4)  | -48(100)  |
| N(2)#1-Os(1)-N(1)-C(4)  | -178.3(3) |
| N(2)-Os(1)-N(1)-C(4)    | 1.7(3)    |
| S(1)-Os(1)-N(1)-C(4)    | 91.6(3)   |
| N(3)-Os(1)-N(2)-C(6)    | 81.0(4)   |
| N(1)-Os(1)-N(2)-C(6)    | -1.9(3)   |
| N(1)#1-Os(1)-N(2)-C(6)  | 178.1(3)  |
| N(2)#1-Os(1)-N(2)-C(6)  | 153(100)  |
| S(1)-Os(1)-N(2)-C(6)    | -91.5(3)  |
| N(3)-Os(1)-N(2)-C(9)    | -97.4(4)  |
| N(1)-Os(1)-N(2)-C(9)    | 179.7(3)  |
| N(1)#1-Os(1)-N(2)-C(9)  | -0.3(3)   |
| N(2)#1-Os(1)-N(2)-C(9)  | -26(100)  |
| S(1)-Os(1)-N(2)-C(9)    | 90.1(3)   |
| N(1)-Os(1)-N(3)-O(1)    | 41(7)     |
| N(1)#1-Os(1)-N(3)-O(1)  | -139(7)   |
| N(2)#1-Os(1)-N(3)-O(1)  | 130(7)    |
| N(2)-Os(1)-N(3)-O(1)    | -50(7)    |
| S(1)-Os(1)-N(3)-O(1)    | 21(10)    |
| C(4)-N(1)-C(1)-C(10)#1  | 178.4(3)  |
| Os(1)-N(1)-C(1)-C(10)#1 | 0.4(4)    |
| C(4)-N(1)-C(1)-C(2)     | -0.2(3)   |
| Os(1)-N(1)-C(1)-C(2)    | -178.2(2) |
| N(1)-C(1)-C(2)-C(3)     | -0.4(3)   |
| C(10)#1-C(1)-C(2)-C(3)  | -179.0(3) |
| N(1)-C(1)-C(2)-C(11)    | 179.8(3)  |
| C(10)#1-C(1)-C(2)-C(11) | 1.2(5)    |
| C(1)-C(2)-C(3)-C(4)     | 0.8(3)    |
| C(11)-C(2)-C(3)-C(4)    | -179.4(3) |
| C(1)-C(2)-C(3)-C(13)    | -178.0(3) |
| C(11)-C(2)-C(3)-C(13)   | 1.8(5)    |
| C(1)-N(1)-C(4)-C(5)     | -178.6(3) |

|                        |           |
|------------------------|-----------|
| Os(1)-N(1)-C(4)-C(5)   | -0.6(5)   |
| C(1)-N(1)-C(4)-C(3)    | 0.7(3)    |
| Os(1)-N(1)-C(4)-C(3)   | 178.7(2)  |
| C(2)-C(3)-C(4)-N(1)    | -0.9(3)   |
| C(13)-C(3)-C(4)-N(1)   | 177.9(3)  |
| C(2)-C(3)-C(4)-C(5)    | 178.4(3)  |
| C(13)-C(3)-C(4)-C(5)   | -2.8(5)   |
| N(1)-C(4)-C(5)-C(6)    | -1.1(5)   |
| C(3)-C(4)-C(5)-C(6)    | 179.7(3)  |
| C(9)-N(2)-C(6)-C(5)    | 179.7(3)  |
| Os(1)-N(2)-C(6)-C(5)   | 1.1(5)    |
| C(9)-N(2)-C(6)-C(7)    | -0.1(3)   |
| Os(1)-N(2)-C(6)-C(7)   | -178.7(2) |
| C(4)-C(5)-C(6)-N(2)    | 0.9(5)    |
| C(4)-C(5)-C(6)-C(7)    | -179.3(3) |
| N(2)-C(6)-C(7)-C(8)    | -0.1(4)   |
| C(5)-C(6)-C(7)-C(8)    | -180.0(3) |
| N(2)-C(6)-C(7)-C(15)   | -178.6(3) |
| C(5)-C(6)-C(7)-C(15)   | 1.5(5)    |
| C(6)-C(7)-C(8)-C(9)    | 0.3(3)    |
| C(15)-C(7)-C(8)-C(9)   | 178.7(3)  |
| C(6)-C(7)-C(8)-C(17)   | -179.1(3) |
| C(15)-C(7)-C(8)-C(17)  | -0.7(5)   |
| C(6)-N(2)-C(9)-C(10)   | -179.1(3) |
| Os(1)-N(2)-C(9)-C(10)  | -0.5(4)   |
| C(6)-N(2)-C(9)-C(8)    | 0.3(3)    |
| Os(1)-N(2)-C(9)-C(8)   | 178.9(2)  |
| C(7)-C(8)-C(9)-N(2)    | -0.4(3)   |
| C(17)-C(8)-C(9)-N(2)   | 179.0(3)  |
| C(7)-C(8)-C(9)-C(10)   | 179.0(3)  |
| C(17)-C(8)-C(9)-C(10)  | -1.6(5)   |
| N(2)-C(9)-C(10)-C(1)#1 | 1.1(5)    |
| C(8)-C(9)-C(10)-C(1)#1 | -178.2(3) |
| C(3)-C(2)-C(11)-C(12)  | -96.5(4)  |
| C(1)-C(2)-C(11)-C(12)  | 83.3(4)   |
| C(2)-C(3)-C(13)-C(14)  | 99.4(4)   |
| C(4)-C(3)-C(13)-C(14)  | -79.2(4)  |
| C(8)-C(7)-C(15)-C(16)  | -101.1(4) |
| C(6)-C(7)-C(15)-C(16)  | 77.1(4)   |
| C(7)-C(8)-C(17)-C(18)  | 89.6(4)   |
| C(9)-C(8)-C(17)-C(18)  | -89.8(4)  |
| Os(1)-S(1)-C(19)-C(20) | 170.2(9)  |

---

Symmetry transformations used to generate equivalent atoms:

#1 -x+1, -y+1, -z+1
